# Supplementary material for: Highly efficient removal of organic pollutants by ultrahigh-surface-area-ethynylbenzene-based conjugated microporous polymers via adsorption–photocatalysis synergy
Source: Royal Society of Chemistry journal article supplement (doi:10.1039/c8cy01379a), 2018-01-01
Supplement: c8cy01379a1.pdf [file c8cy01379a1.pdf]

**Supporting information**

**Highly efficient removal of organic pollutants by ultrahigh-surface-area-ethynylbenzene-based conjugated microporous polymers via adsorption-photocatalysis synergy**

Junhui Wang<sup>†</sup>, Huangsheng Yang<sup>†</sup>, Long Jiang<sup>†</sup>, Shuqin Liu<sup>†</sup>, Zhengping Hao<sup>‡</sup>, Jie Cheng<sup>‡\*</sup>, Gangfeng Ouyang<sup>†\*</sup>

<sup>†</sup> MOE Key Laboratory of Bioinorganic and Synthetic Chemistry, School of Chemistry, Sun Yat-Sen University, No. 135, Xingang Xi Road, Guangzhou, Guangdong, 510275, China

<sup>‡</sup> National Engineering Laboratory for VOCs Pollution Control Material & Technology, University of Chinese Academy of Sciences, Beijing, 100049, China

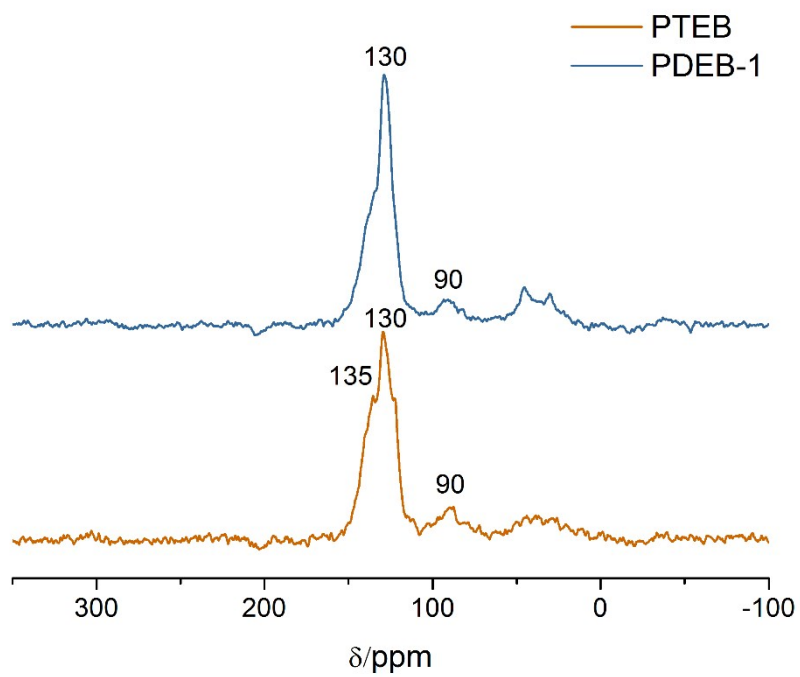

**Figure S1.** Solid-state NMR spectra for PTEB and PDEB-1.

**Table S1.** Elemental analysis and ICP-MS results of the catalysts.

| Sample | C (wt.%) | H (wt.%) | Pd (wt.%) |
|--------|----------|----------|-----------|
| PTEB   | 93.71    | 4.55     | 0.0383    |
| PDEB-1 | 93.68    | 4.28     | 0.0257    |
| PDEB-2 | 93.83    | 4.94     | 0.0932    |

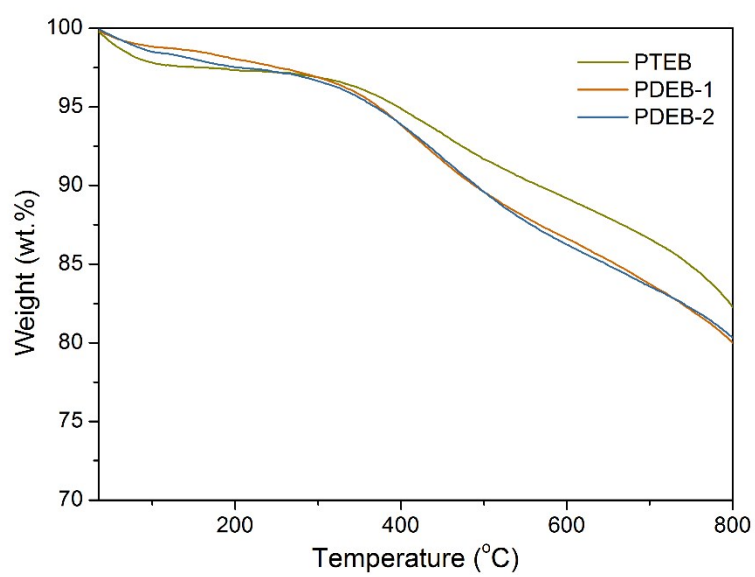

**Figure S2.** Thermogravimetric curves for PTEB, PDEB-1 and PDEB-2 materials

**Table S2.** The pseudo-first-order and pseudo-second-order parameters and the correlation coefficients ( $R^2$ ) of the adsorption kinetic models.

| Materials | Pseudo-first-order model |           |       | Pseudo-second-order model |           |       |
|-----------|--------------------------|-----------|-------|---------------------------|-----------|-------|
|           | $k_1$                    | $q_{e,1}$ | $R^2$ | $k_2$                     | $q_{e,2}$ | $R^2$ |
| PTEB      | 0.102                    | 200       | 0.999 | 3.890                     | 173       | 0.858 |
| PDEB-1    | 0.076                    | 196       | 0.991 | 2.210                     | 156       | 0.782 |
| PDEB-2    | 0.022                    | 104       | 0.943 | 0.00094                   | 79        | 0.493 |

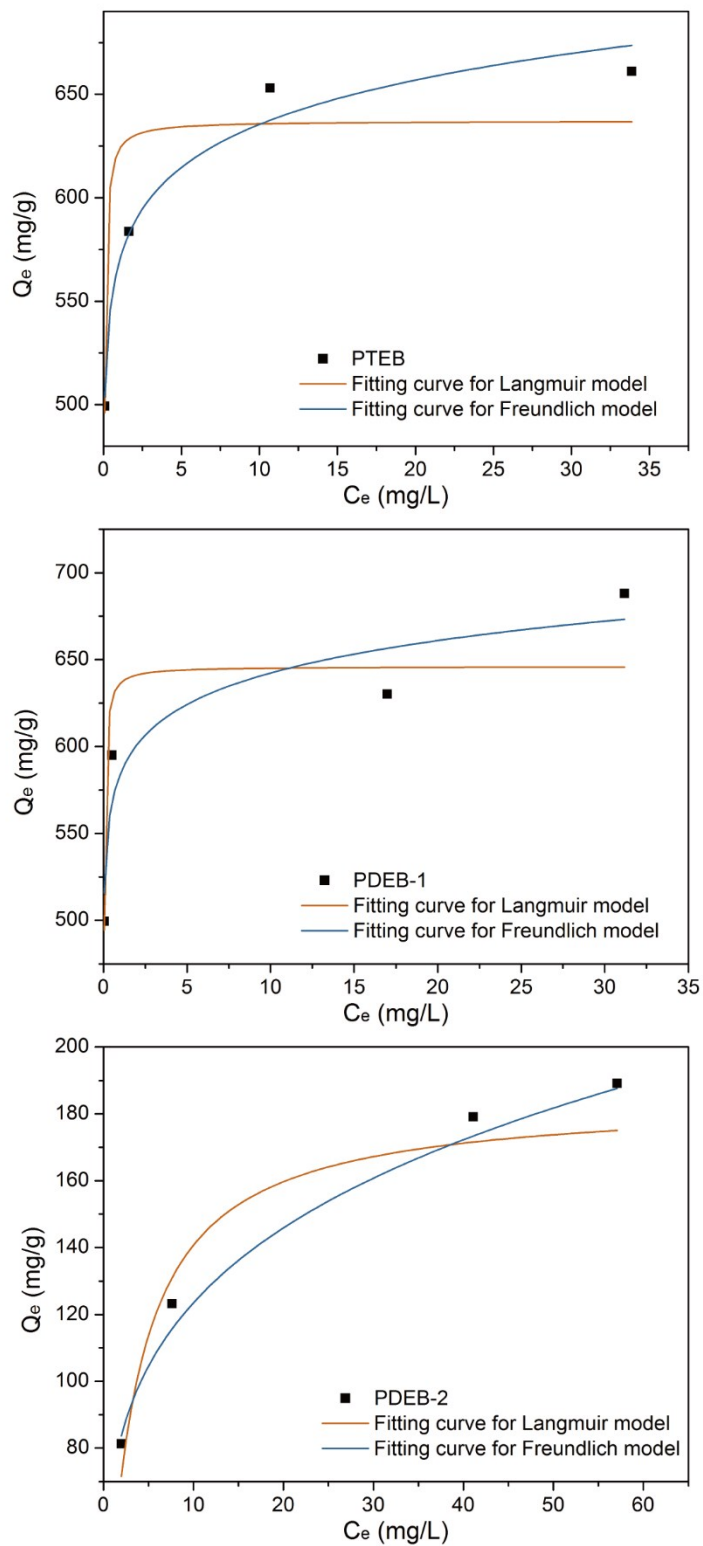

**Figure S3.** The fitting curves of Langmuir and Freundlich model for the adsorption isotherms of RhB on the polymers.

**Table S3.** The constants of Langmuir and Freundlich isotherms for RhB adsorption on the three polymers at 25 °C.

| Materials | Langmuir model |      |       | Freundlich model |     |       |
|-----------|----------------|------|-------|------------------|-----|-------|
|           | $q_m$          | $b$  | $R^2$ | $K$              | $n$ | $R^2$ |
| PTEB      | 637            | 45   | 0.742 | 569              | 21  | 0.962 |
| PDEB-1    | 646            | 66   | 0.754 | 583              | 24  | 0.845 |
| PDEB-2    | 185            | 0.32 | 0.853 | 71               | 4.2 | 0.955 |

**To prove the elution process is effective to elute all the RhB adsorbed on the photocatalysts:**

5 mg of PDEB-1 was dispersed in 50 mL of RhB solution (20 mg/L) and stirred until RhB was totally adsorbed (the UV-Vis Absorbance of the supernatant is zero). After been kept still for 2 days, most of the water was removed and then the residue (catalyst and little water) was dried at 100 °C under vacuum for 24 h. After then, 50 mL of methanol was added and mixed with the dried catalyst, and treated by ultrasound under 50 °C for 30 min. The eluent of RhB from the catalyst was tested by the UV-Vis.

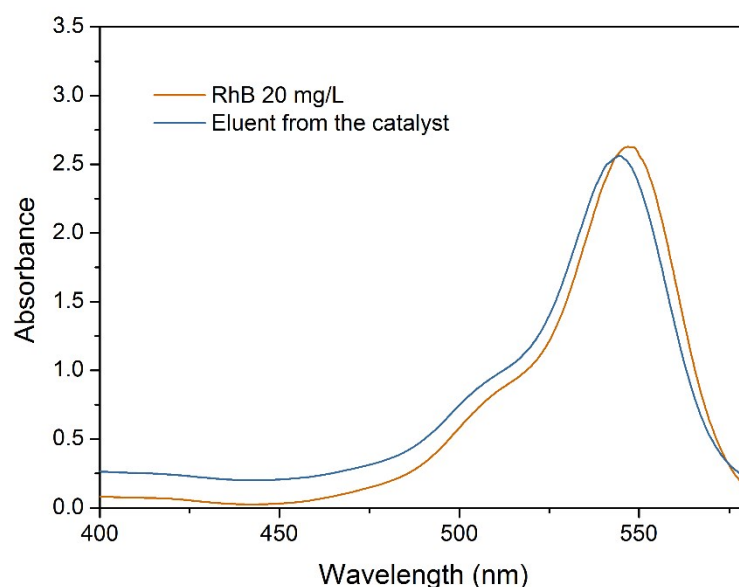

**Figure S4.** UV-Vis spectra of the RhB solution (20 mg/L) and the eluent from the catalyst.



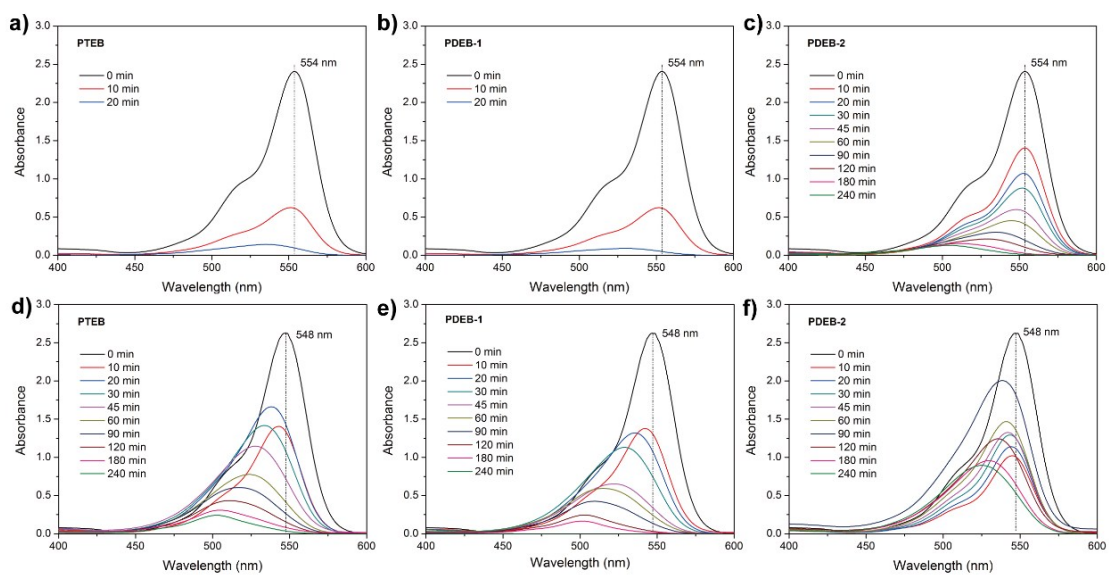

**Figure S5.** Temporal UV-Vis absorption spectral changes for the RhB solution (supernatant: a-c; eluent: d-f) as a function of irradiation time photocatalyzed by three conjugated polymers

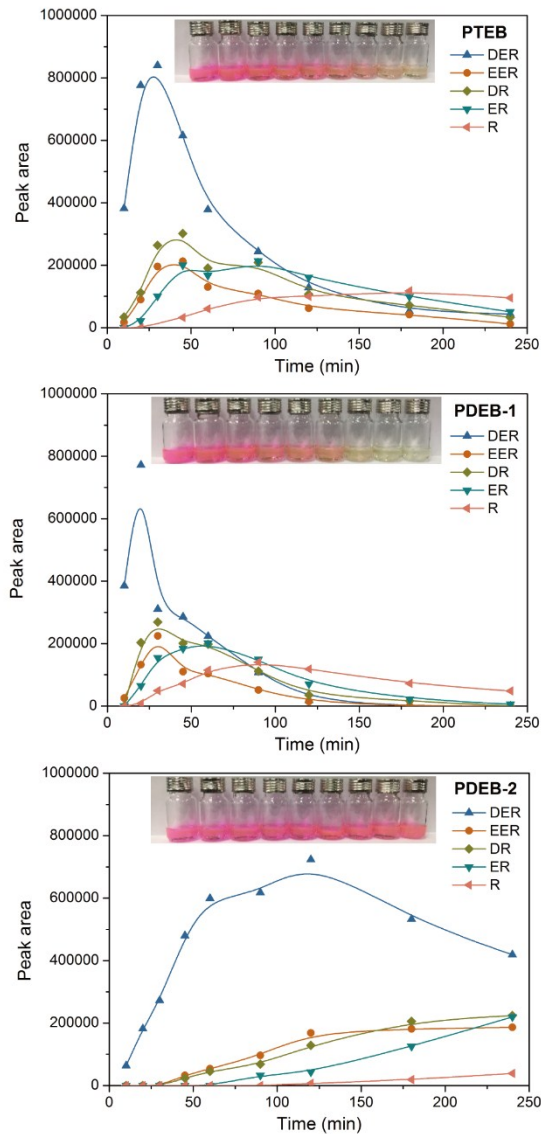

**Figure S6.** Variations in the distribution of the intermediate products in the corresponding eluents.

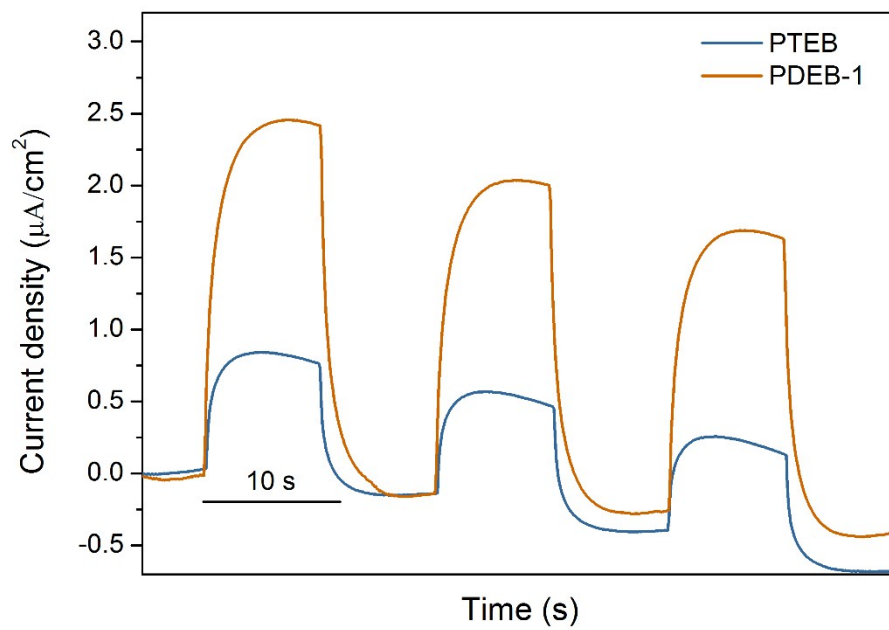

**Figure S7.** The photocurrent generated by PTEB and PDEB-1 under visible light.

**Table S4.** Comparison of the photocatalytic performance of the various reported photocatalysts and PDEB-1 towards RhB under visible light

| Materials                                                       | $C_{\text{catalyst}}$<br>(mg/L) <sup>a</sup> | $C_{\text{RhB}}$<br>(mg/L) | Treating<br>time (min) | Removal<br>ratio | Removal<br>rate (h <sup>-1</sup> ) <sup>b</sup> | Ref.         |
|-----------------------------------------------------------------|----------------------------------------------|----------------------------|------------------------|------------------|-------------------------------------------------|--------------|
| PDEB-1                                                          | 100                                          | 20                         | 20                     | 98%              | 0.588                                           | This<br>work |
| Py-BF-CMP                                                       | 200                                          | 75                         | 40                     | 95%              | 0.534                                           | 1            |
| g-C <sub>3</sub> N <sub>4</sub> /Nb <sub>2</sub> O <sub>5</sub> | 1000                                         | 10                         | 90                     | 80%              | 0.005                                           | 2            |
| BiOI@Bi <sub>12</sub> O <sub>17</sub> Cl <sub>2</sub>           | 1000                                         | 10                         | 300                    | 100%             | 0.002                                           | 3            |
| PANI/TiO <sub>2</sub>                                           | 500                                          | 10                         | 100                    | 97%              | 0.012                                           | 4            |
| PNNs                                                            | 150                                          | 10                         | 80                     | 100%             | 0.050                                           | 5            |
| TiO <sub>2</sub> /In <sub>2</sub> O <sub>3</sub>                | 1000                                         | 10                         | 180                    | 90%              | 0.003                                           | 6            |
| N-CQDs/BiOBr                                                    | 200                                          | 10                         | 50                     | 100%             | 0.060                                           | 7            |
| CPNB/FCF                                                        | 250                                          | 4.8                        | 180                    | 90%              | 0.006                                           | 8            |
| Ag <sub>2</sub> O/BiO <sub>2</sub> COOH                         | 300                                          | 6                          | 60                     | 100%             | 0.020                                           | 9            |

<sup>a</sup> The ratio of the mass of the catalyst and the volume of the RhB solution.

<sup>b</sup> The amount of RhB degraded per hour per unit mass of catalyst.

[1] B. Wang, Z. Xie, Y. Li, Z. Yang, L. Chen, *Macromolecules* 51 (2018) 3443-3449.

[2] G.T.S.T. da Silva, K.T.G. Carvalho, O.F. Lopes, C. Ribeiro, *Appl. Catal. B* 216 (2017) 70-79.

[3] H. Huang, K. Xiao, Y. He, T. Zhang, F. Dong, X. Du, Y. Zhang, *Appl. Catal. B* 199 (2016) 75-86.

- [4] H. Zhang, R.L. Zong, J.C. Zhao, Y.F. Zhu, *Environ. Sci. Technol.* 42 (2008) 3803-3807.
- [5] L. Zhang, X.H. Huang, J.S. Hu, J. Song, I. Kim, *Langmuir* 33 (2017) 1867-1871.
- [6] C. Li, T. Ming, J. Wang, J. Wang, J.C. Yu, S.-h. Yu, *J. Catal.* 310 (2014) 84-90.
- [7] J. Di, J. Xia, M. Ji, B. Wang, X. Li, Q. Zhang, Z. Chen, H. Li, *ACS Sustain. Chem. Eng.* 4 (2016) 136-146.
- [8] X.X. Xu, H.Y. Yang, Z.Y. Li, X.X. Liu, X.L. Wang, *Chem. Eur. J.* 21 (2015) 3821-3830.
- [9] S. Li, K. Xu, S. Hu, W. Jiang, J. Zhang, J. Liu, L. Zhang, *Appl. Surf. Sci.* 397 (2017) 95-103.
